# Supplementary figures and images for: Using pathway modules as targets for assay development in xenobiotic screening
Source: Royal Society of Chemistry journal article supplement (doi:10.1039/c1mb05303e), 2011-11-10

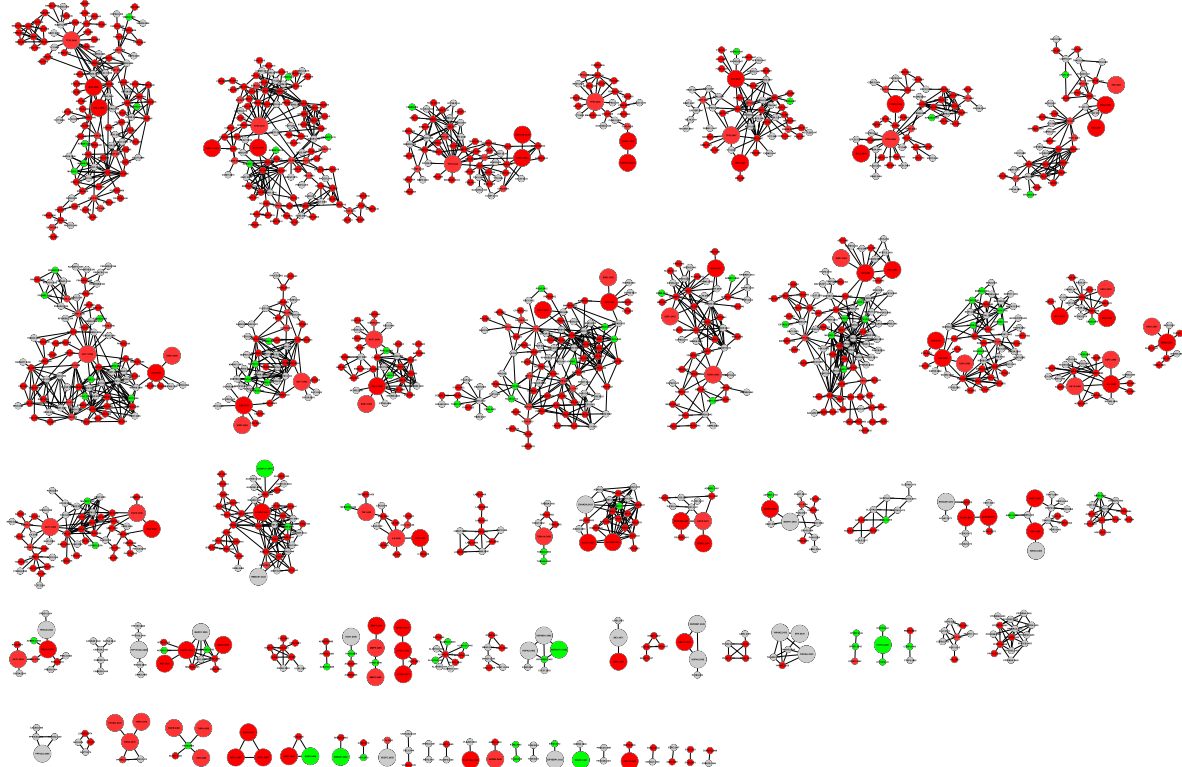

Supplement: c1mb05303e.pdf [file c1mb05303e.pdf]
